# Supplementary material for: Commercialized artemisinin derivatives combined with colistin protect against critical Gram-negative bacterial infection
Source: PubMed Central journal article supplement (PMC9458715; doi:10.1038/s42003-022-03898-5), 2022-09-08
Supplement: 42003_2022_3898_MOESM1_ESM.pdf [file 42003_2022_3898_MOESM1_ESM.pdf]

## Supplementary Figure and Figure legends:

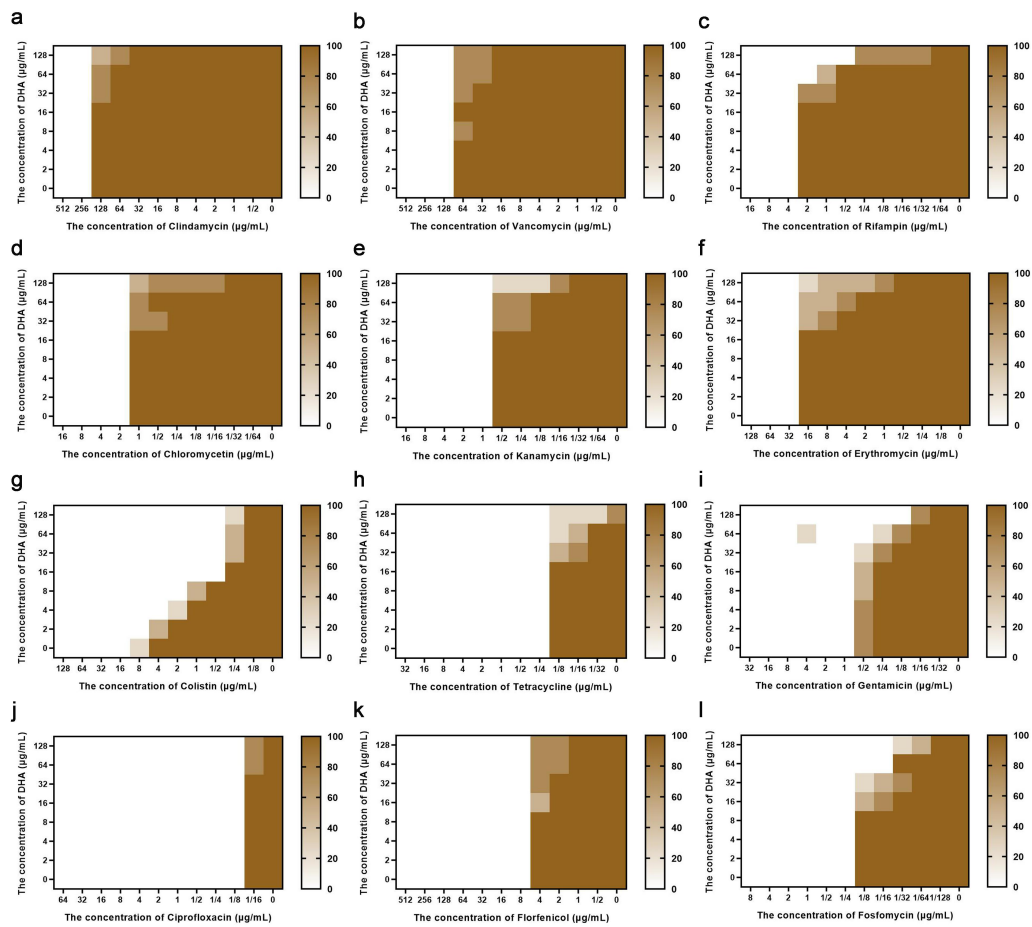

**Supplementary Fig 1. The checkerboard MIC detection of DHA in combination with 12 different antibiotics against *E. coli* W3110 (pUC19-*mcr-I*).** a-l The checkerboard MICs were determined in quadruplicate, and used the color shade to indicate the probability of bacterial growth in the well. The more bacterial growth visible to the naked eye, the darker the color.

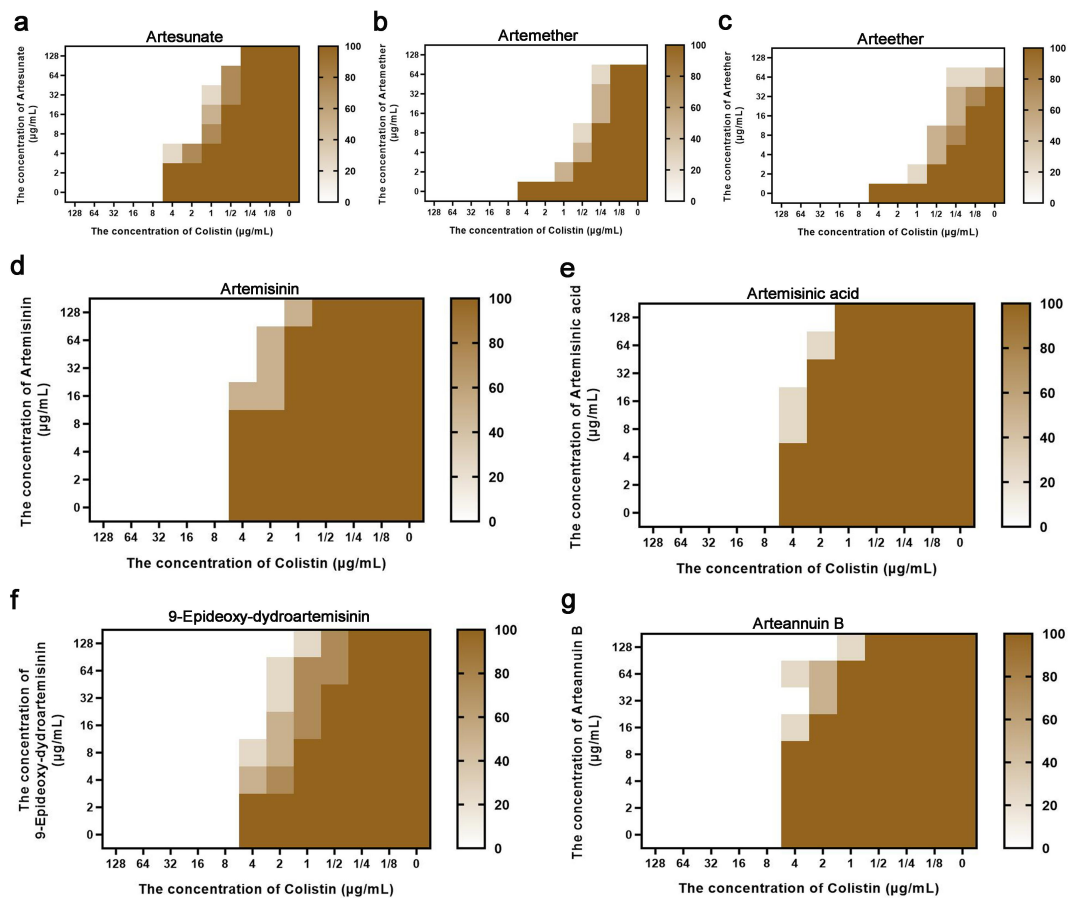

**Supplementary Fig 2. The checkerboard MIC detection.** a-g The checkerboard MIC detection of artemisinin derivatives, artesunate (a), artemether (b), arteether (c), artemisinin (d), artemisinic acid (e), 9-epideoxy-dydroartemisinin (f) and arteannuin B (g), in combination with colistin against *E. coli* W3110 (pUC19-*mcr-I*). The checkerboard MICs were determined in quadruplicate, and used the color shade to indicate the probability of bacterial growth in the well. The more bacterial growth visible to the naked eye, the darker the color.



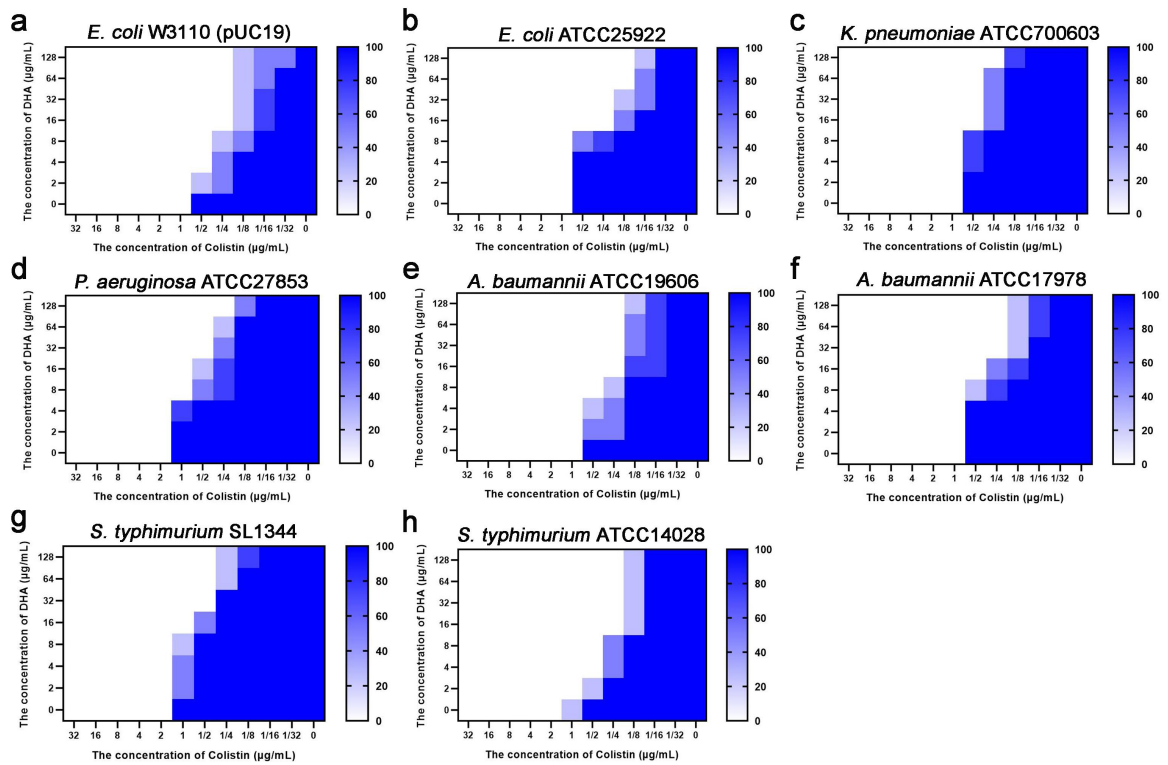

**Supplementary Fig 5. The checkerboard MIC detection of DHA in combination with colistin against polymyxin-sensitive bacterial strains. a-h** The checkerboard MICs were determined in quadruplicate, and used the color shade to indicate the probability of bacterial growth in the well. The more bacterial growth visible to the naked eye, the darker the color.

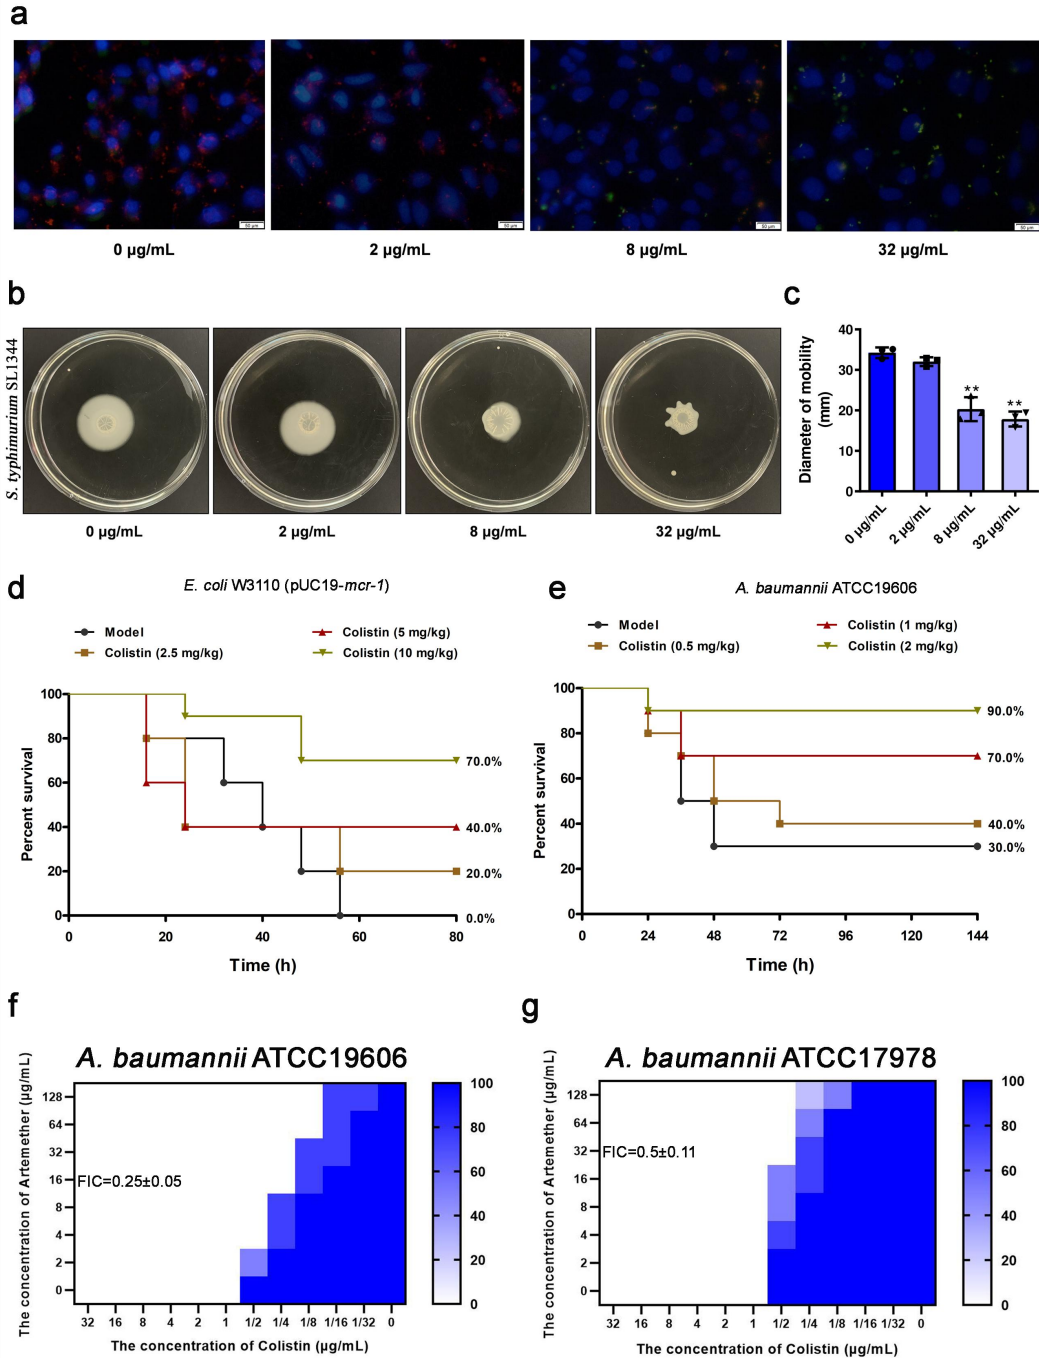

**Supplementary Fig 6. a** Immunofluorescence microscopy detection of DHA on *S. typhimurium* SL1344 (MCR-1-negative) invasion of HeLa cells (scale bar = 50 µm). **b, c** The motility of *S. typhimurium* SL1344 on agar plates was photographed, and the mobility diameter was measured. **d, e** Effective dose screening of colistin for the treatment of *E. coli* W3110 (pUC19-*mcr-1*) or *A. baumannii* ATCC19606

infection(n=10, per group). **f, g** The checkerboard MIC detection of artemether in combination with colistin against *A. baumannii* ATCC19606 and *A. baumannii* ATCC17978. The checkerboard MICs were determined in quadruplicate, and used the color shade to indicate the probability of bacterial growth in the well. The more bacterial growth visible to the naked eye, the darker the color.

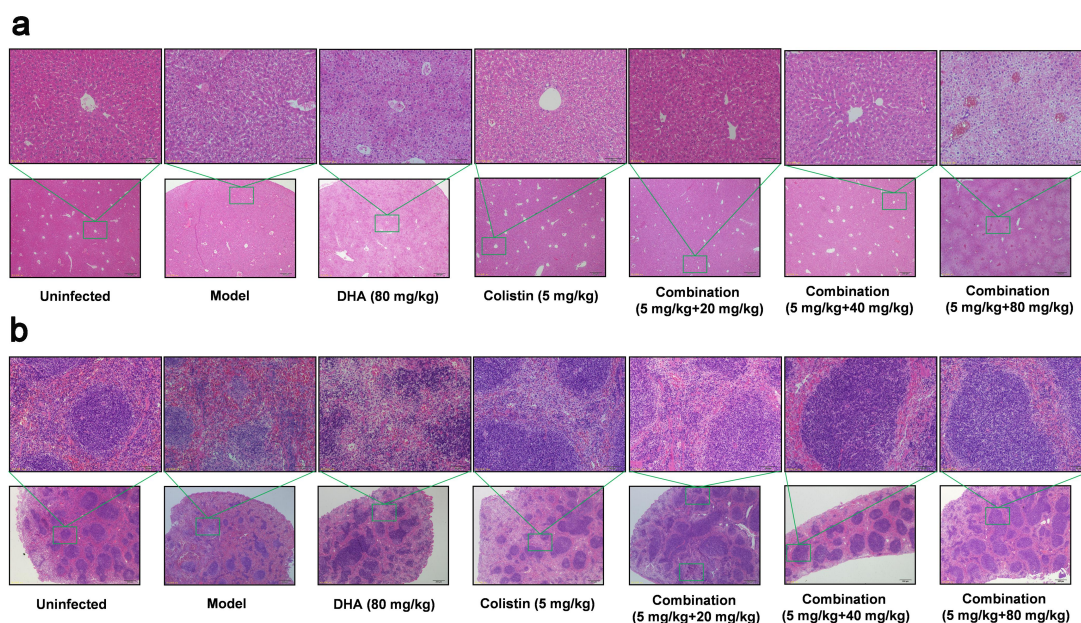

**Supplementary Fig 7. Histopathology of the liver and spleen of *E. coli* W3110 (pUC19-*mcr-I*) infected mice after administration. a, b** Histopathology of the liver (a) and spleen (b) of *E. coli* W3110 (pUC19-*mcr-I*) infected mice after administration (scale bar = 200  $\mu$ m). Fewer pathological changes in the liver and spleen were noted after low-combined administration (5 mg/kg +20 mg/kg) and medium-combined administration (5 mg/kg +40 mg/kg) than after the administration of either agent

alone. However, high-dose combined administration (5 mg/kg +80 mg/kg) and DHA injection (80 mg/kg) alone appeared to have a significant lesion on the liver with hyperemia and cellular deformation.

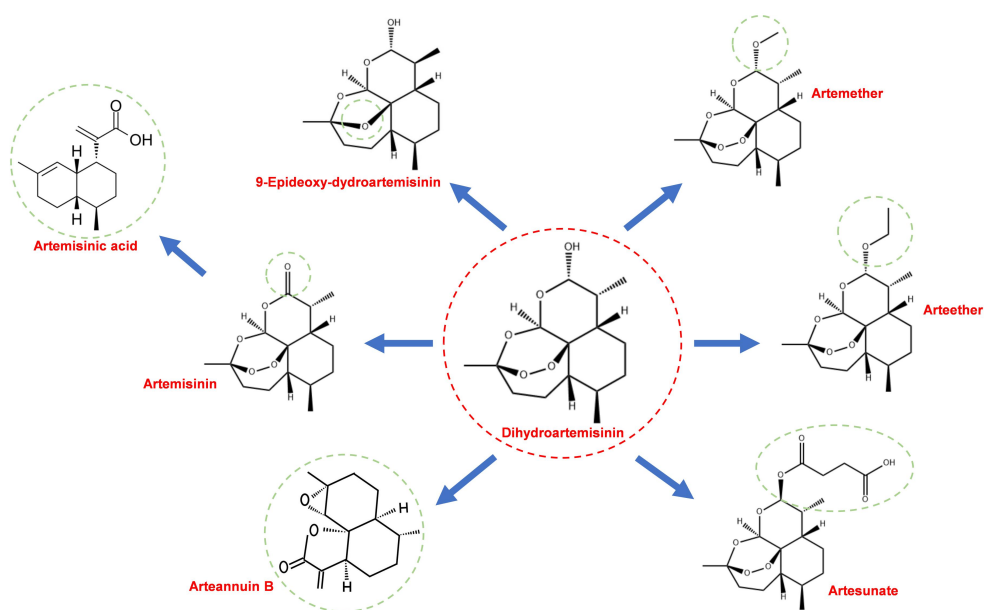

**Supplementary Fig 8. The relationship between the molecular structures of artemisinin derivatives.** Artesunate, artemether and arteether are extremely similar to DHA. 9-Epideoxy-dydroartemisinin and artemisinin have the second highest similarity with DHA.

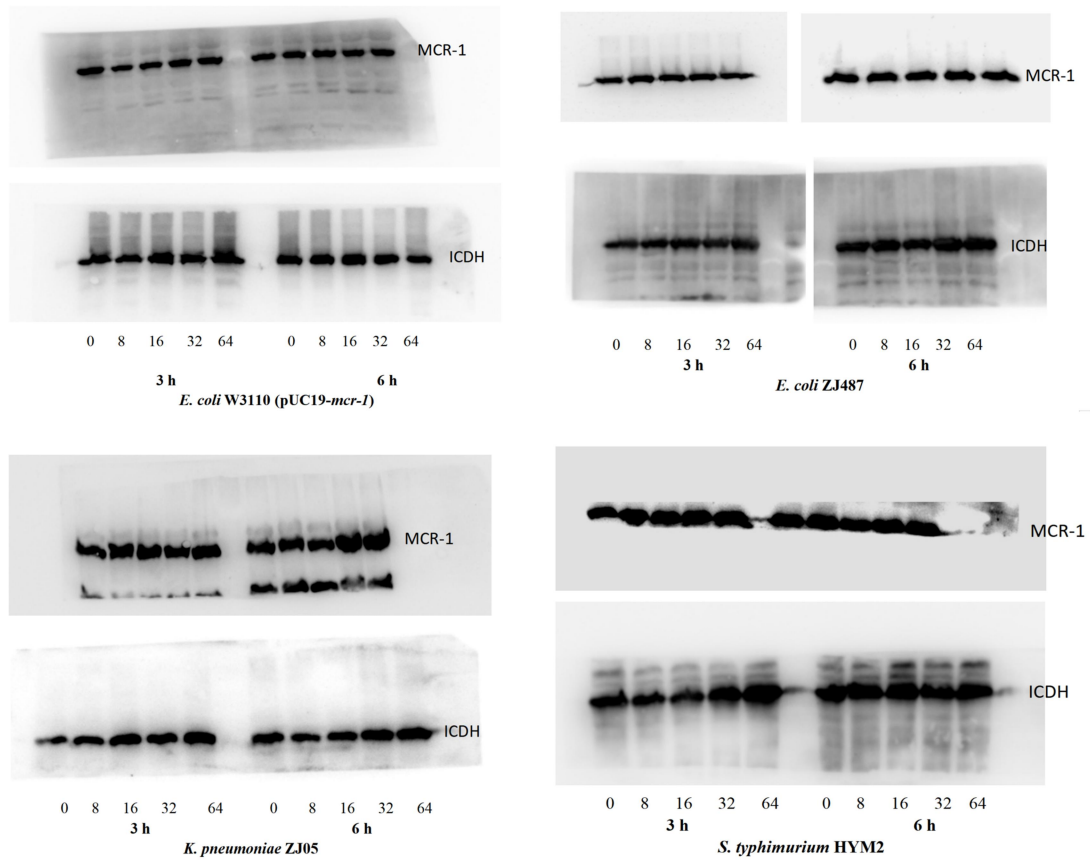

**Supplementary Fig 9. Uncropped western blotting images.** The effect of different concentrations of DHA (0, 8-64 μg/mL) treatment on the expression of MCR-1 in different strains of bacteria in 3h or 6 h.



**Supplementary Table 1. MIC values of colistin and DHA combination therapy for each of the tested bacterial isolates.**

| Species                                       | Source/Description                                                                                    | MIC ( $\mu\text{g/mL}$ ) |                 | <i>mcr-1/3/5</i><br>confirmation | FICs index      |
|-----------------------------------------------|-------------------------------------------------------------------------------------------------------|--------------------------|-----------------|----------------------------------|-----------------|
|                                               |                                                                                                       | Alone                    | Combination     |                                  |                 |
| <i>E. coli</i> W3110 (pUC19- <i>mcr-1</i> )   | Laboratory strain<br>(carried a <i>mcr-1</i> gene that originated from <i>K. pneumoniae</i><br>ZJ05 ) | 8.00 $\pm$ 0.00          | 0.50 $\pm$ 0.00 | +                                | 0.09 $\pm$ 0.00 |
| <i>E. coli</i> W3110 (pUC19)                  | Laboratory strain                                                                                     | 1.00 $\pm$ 0.00          | 0.14 $\pm$ 0.07 | -                                | 0.17 $\pm$ 0.07 |
| <i>E. coli</i> DZ2-12R                        | Chicken cloacae                                                                                       | 16.00 $\pm$ 0.00         | 1.25 $\pm$ 0.43 | +                                | 0.11 $\pm$ 0.03 |
| <i>E. coli</i> ZJ69                           | Human urine                                                                                           | 16.00 $\pm$ 0.00         | 1.00 $\pm$ 0.00 | +                                | 0.09 $\pm$ 0.00 |
| <i>E. coli</i> ZJ378                          | Human feces                                                                                           | 10.00 $\pm$ 3.46         | 0.88 $\pm$ 0.65 | +                                | 0.11 $\pm$ 0.03 |
| <i>E. coli</i> ZJ487                          | Human intra-abdominal fluid ( <i>bla</i> <sub>NDM-1</sub> -carrying)                                  | 16.00 $\pm$ 0.00         | 1.25 $\pm$ 0.43 | +                                | 0.11 $\pm$ 0.03 |
| <i>E. coli</i> ZJ40                           | Remote tertiary care hospital ( <i>mcr-1</i> located in chromosome)                                   | 20.00 $\pm$ 6.93         | 1.75 $\pm$ 0.43 | +                                | 0.13 $\pm$ 0.03 |
| <i>S. typhimurium</i> HYM2                    | Animal farm                                                                                           | 24.00 $\pm$ 8.00         | 1.13 $\pm$ 0.54 | +                                | 0.08 $\pm$ 0.02 |
| <i>K. pneumoniae</i> ZJ05                     | Remote tertiary care hospital                                                                         | 48.00 $\pm$ 16.00        | 1.25 $\pm$ 0.43 | +                                | 0.06 $\pm$ 0.01 |
| <i>K. pneumoniae</i> ZJ02                     | Remote tertiary care hospital                                                                         | 48.00 $\pm$ 16.00        | 5.00 $\pm$ 1.73 | +                                | 0.14 $\pm$ 0.03 |
| <i>K. pneumoniae</i> 13b5                     | Chicken cloacae                                                                                       | 40.00 $\pm$ 13.86        | 2.25 $\pm$ 1.09 | +                                | 0.09 $\pm$ 0.01 |
| <i>K. pneumoniae</i> E8.31                    | Chicken cloacae                                                                                       | 32.00 $\pm$ 0.00         | 1.75 $\pm$ 0.43 | +                                | 0.09 $\pm$ 0.01 |
| <i>E. coli</i> W3110 (pUC19- <i>mcr-3</i> )   | Laboratory strain (carried a <i>mcr-3</i> gene)                                                       | 6.00 $\pm$ 2.00          | 0.88 $\pm$ 0.22 | +                                | 0.19 $\pm$ 0.05 |
| <i>E. coli</i> MG1655 (pBAD24- <i>mcr-5</i> ) | Laboratory strain (carried a <i>mcr-5</i> gene)                                                       | 16.00 $\pm$ 0.00         | 1.50 $\pm$ 0.50 | +                                | 0.13 $\pm$ 0.03 |
| <i>Salmonella</i> 15E464                      | 14,5,12:i:- (carried a <i>mcr-3</i> gene)                                                             | 96.00 $\pm$ 32.00        | 4.50 $\pm$ 2.18 | +                                | 0.08 $\pm$ 0.02 |

|                                  |                                                                  |               |             |   |           |
|----------------------------------|------------------------------------------------------------------|---------------|-------------|---|-----------|
| <i>E. coli</i> HLJ109-11         | <i>pmr</i> B mutation (Polymyxin-resistant <i>mcr</i> -negative) | 448.00±110.85 | 64.00±39.19 | - | 0.17±0.07 |
| <i>K. pneumoniae</i> 16ZJJ9-19BC | Chicken cloacae<br>(Polymyxin-resistant <i>mcr</i> -negative)    | 32.00±0.00    | 7.00±1.73   | - | 0.25±0.05 |
| <i>S. typhimurium</i> GP9        | Animal farm<br>(Polymyxin-resistant <i>mcr</i> -negative)        | 24.00±8.00    | 12.00±4.00  | - | 0.53±0.00 |
| <i>E. coli</i> ATCC25922         | Laboratory strain                                                | 1.00±0.00     | 0.19±0.06   | - | 0.22±0.06 |
| <i>K. pneumoniae</i> ATCC700603  | Laboratory strain                                                | 1.00±0.00     | 0.38±0.13   | - | 0.41±0.13 |
| <i>P. aeruginosa</i> ATCC27853   | Laboratory strain                                                | 2.00±0.00     | 0.56±0.27   | - | 0.31±0.14 |
| <i>A. baumannii</i> ATCC19606    | Laboratory strain                                                | 1.00±0.00     | 0.11±0.03   | - | 0.14±0.03 |
| <i>A. baumannii</i> ATCC17978    | Laboratory strain                                                | 1.00±0.00     | 0.34±0.16   | - | 0.38±0.16 |
| <i>S. typhimurium</i> ATCC14028  | Laboratory strain                                                | 1.25±0.43     | 0.16±0.05   | - | 0.16±0.00 |
| <i>S. typhimurium</i> SL1344     | Derived from the virulent strain SL1344                          | 2.00±0.00     | 0.75±0.25   | - | 0.41±0.13 |

All MICs were determined in quadruplicate. The concentration of DHA was 16 µg/mL in all bacteria. And the data were presented as the mean ± standard deviation. “+” represents *mcr-I*-positive species, “-” represents *mcr-I*-negative species.

**Supplementary Table 2. The primers of all the point mutations for MCR-1**

| Primer names      | Oligonucleotide primer sequence (5'–3')                                                                  |
|-------------------|----------------------------------------------------------------------------------------------------------|
| MCR-1-WT          | F: CGCGGATCCTGTATGGGATTGCGCAATGATT<br>R: CCGCTCGAGTCAGCGGATGAATGCGGTGCGGTCTTT                            |
| MCR-1-MET-336-Ala | F: GGACTCAAAGGCGT <u>GCGG</u> GATAAGCTGCCAAAAG<br>R: CTTTTGGCAGCTTAT <u>CGCC</u> CACGCCTTTTGAGTCC        |
| MCR-1-ASP-337-Ala | F: CAAAAGGCGTGATGG <u>GCGA</u> AGCTGCCAAAAGC<br>R: GTTTTGGCAGCTT <u>CGCC</u> ATCACGCCTTTTG               |
| MCR-1-PRO-340-Ala | F: CGTGATGGATAAGCTGG <u>GCGA</u> AGCGCAATTTGCCG<br>R: CGGCAAATTGCGCTTT <u>CGCC</u> CAGCTTATCCATCACG      |
| MCR-1-GLN-343-Ala | F: GATAAGCTGCCAAAAGCG <u>GCGT</u> TTGCCGATTATAAATCC<br>R: GGATTATAATCGGCAA <u>ACGCGC</u> TTTTGGCAGCTTATC |
| MCR-1-LYS-348-Ala | F: GCAATTTGCCGATTAT <u>GCGT</u> CCGCGACCAACAACG<br>R: CGTTGTTGGTCGCGGAC <u>GCGA</u> TATCGGCAAATTGC       |
| pUC19 vector      | F: GGAGGATCCGGATCCATCGTTCAAAC<br>R: ATCGAATTCATCGATTACTAGTAACATAG                                        |

<sup>a</sup> Mutated codons are underlined.

**Supplementary Table 3. Composition of dihydroartemisinin injection**

| Composition           | Content | Manufacturer                                              | Molecular weight |
|-----------------------|---------|-----------------------------------------------------------|------------------|
| N-N-Dimethylacetamide | 30 mL   | Finar Ltd., Gujarat, India.                               | 87.12            |
| Castor oil            | 69 mL   | Hunan Er-Kang Pharmaceutical Co.,<br>Ltd., Hunan, China   | /                |
| Benzyl alcohol        | 1 mL    | Tianjin Huadong Reagent Factory,<br>Tianjin, China        | 108.14           |
| Dihydroartemisinin    | 1 g     | Chengdu Deruike Biotechnology Co.,<br>Ltd. Chengdu, China | 284.35           |
