# Supplementary material for: Commercialized artemisinin derivatives combined with colistin protect against critical Gram-negative bacterial infection
Source: PubMed Central journal article supplement (PMC9458715; doi:10.1038/s42003-022-03898-5), 2022-09-08
Supplement: 42003_2022_3898_MOESM2_ESM.pdf [file 42003_2022_3898_MOESM2_ESM.pdf]

## Description of Additional Supplementary Files

**File name:** Supplementary Data 1

**Description:** Source data for the main figures.
